# Supplementary material for: Magnetic and near-infrared-II fluorescence Au–Gd nanoclusters for imaging-guided sensitization of tumor radiotherapy
Source: Royal Society of Chemistry journal article supplement (doi:10.1039/d2na00044j), 2022-01-01
Supplement: d2na00044j1.pdf [file d2na00044j1.pdf]

## Supporting information

### **Magnetic and near-infrared-II Fluorescence Au-Gd Nanoclusters for Imaging-Guided Sensitization of Tumor Radiotherapy**

*Hui Zhao<sup>a, 1</sup>, Hao Wang<sup>b, 1</sup>, Hairu Li<sup>c</sup>, Tiecheng Zhang<sup>a</sup>, Jing Zhang<sup>a</sup>, Wenhui Guo<sup>a</sup>, Kuang Fu<sup>a, \*</sup>, Guoqing Du<sup>c, d, \*</sup>*

<sup>a</sup> Department of MRI Diagnosis, The Second Affiliated Hospital of Harbin Medical University, Harbin 150086, Heilongjiang Province, P. R. China

<sup>b</sup> Department of Respiratory and Critical Care Medicine, The Second Affiliated Hospital of Harbin Medical University, Harbin 150086, Heilongjiang Province, P. R. China

<sup>c</sup> Department of Ultrasound, The Second Affiliated Hospital of Harbin Medical University, Harbin 150086, Heilongjiang Province, P. R. China

<sup>d</sup> Department of Ultrasound, Guangdong Provincial People's Hospital, Guangdong Academy of Medical Sciences, Guangzhou 510080, Guangdong Province, P. R. China

<sup>1</sup> Hui Zhao and Hao Wang contributed equally to this work.

\* Corresponding authors. E-mail: [duguoqing@hrbmu.edu.cn](mailto:duguoqing@hrbmu.edu.cn) (Guoqing Du), [3996@hrbmu.edu.cn](mailto:3996@hrbmu.edu.cn) (Kuang Fu).

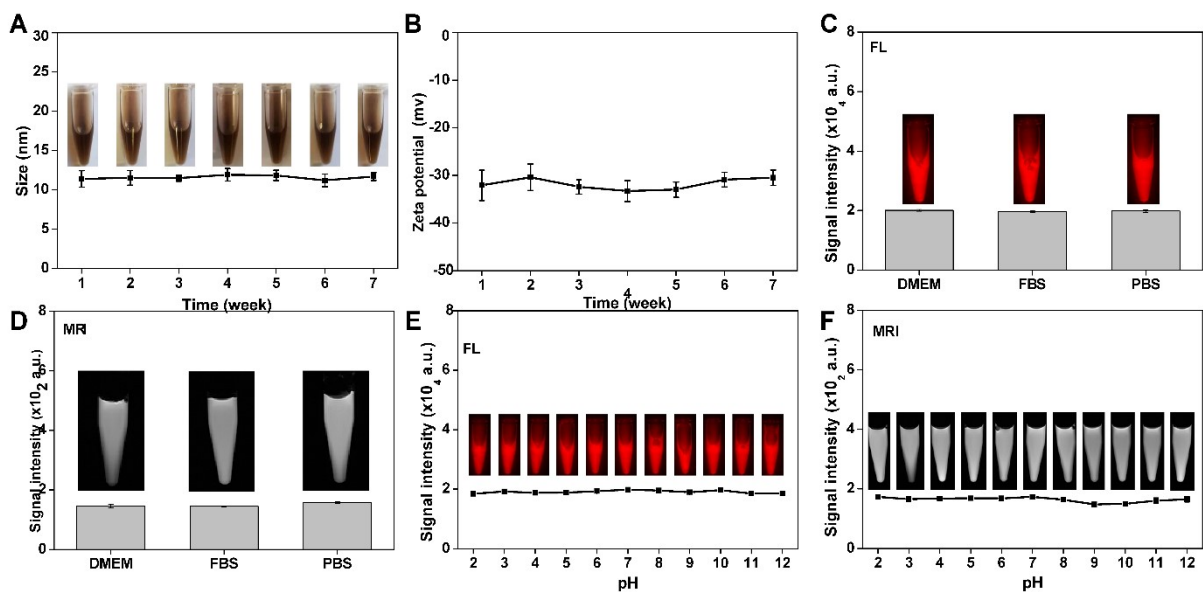

**Figure S1. Characterization of Au-Gd NCs.** **A)** The hydrodynamic diameter variation of Au-Gd NCs in 7 weeks. The insets: digital photograph of Au-Gd NCs in 1st to 7th week after synthesis. **B)** The zeta potential variation of Au-Gd NCs in 7 weeks. **C)** The NIR-II FL intensity of Au-Gd NCs with the same concentration in DMEM, FBS and PBS (pH 7.4, 0.1 M) solution. The insets: NIRF-II images of Au-Gd NCs in different solutions. **D)** The MRI signal intensity of Au-Gd NCs with the same concentration in DMEM, FBS and PBS (pH 7.4, 0.1 M) solution. The insets: MRI images of Au-Gd NCs in different solutions. **E)** The NIR-II FL intensity of Au-Gd NCs with the same concentration in solution with different values of pH (2-12). The insets: NIRF-II images of Au-Gd NCs with different pH values. **F)** The MRI signal intensity of Au-Gd NCs with the same concentration in solution with different values of pH (2-12). The insets: MRI images of Au-Gd NCs with different pH values

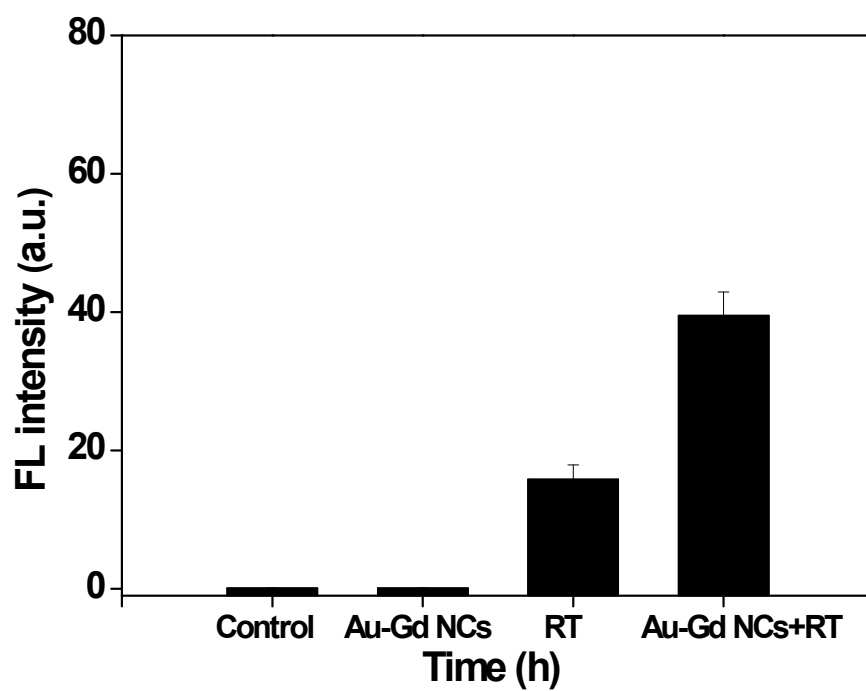

**Figure S2** Semiquantification of  $\gamma$ -H<sub>2</sub>AX density using the Image J software.

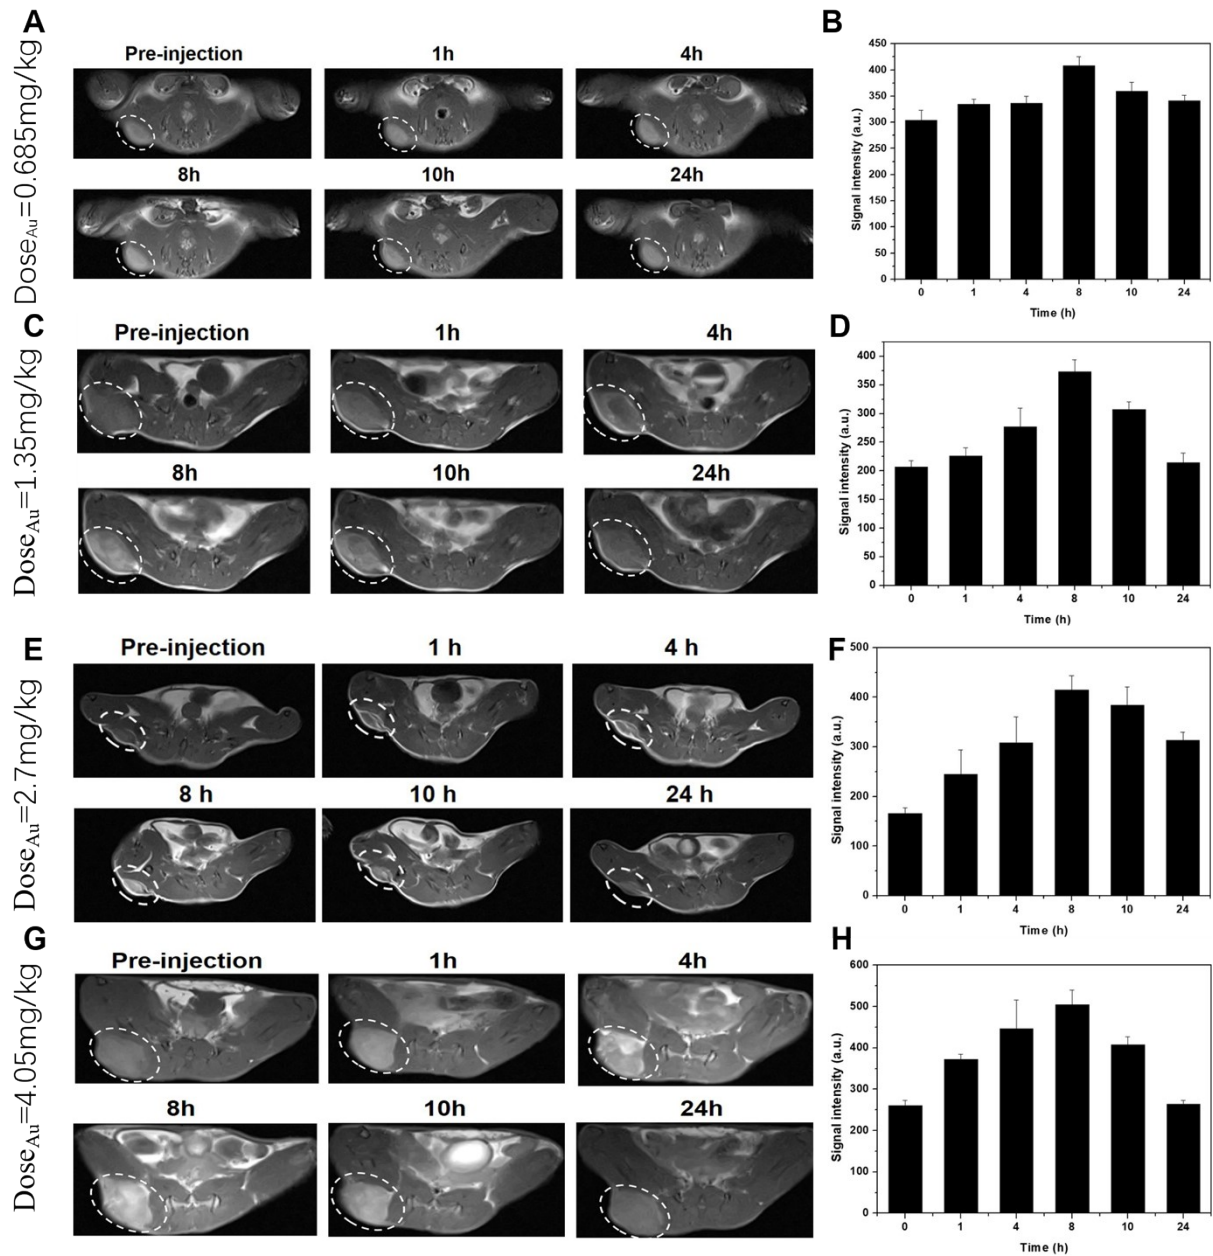

**Figure S3 In vivo MR imaging of tumors.** A,C,E,G) T1-weight MRI images of Au-Gd NCs in C6 subcutaneous tumor-bearing mice at different time intervals. B,D,F,H) Quantitative analysis of tumor signal intensity at different time points after IV injection of Au-Gd NCs.

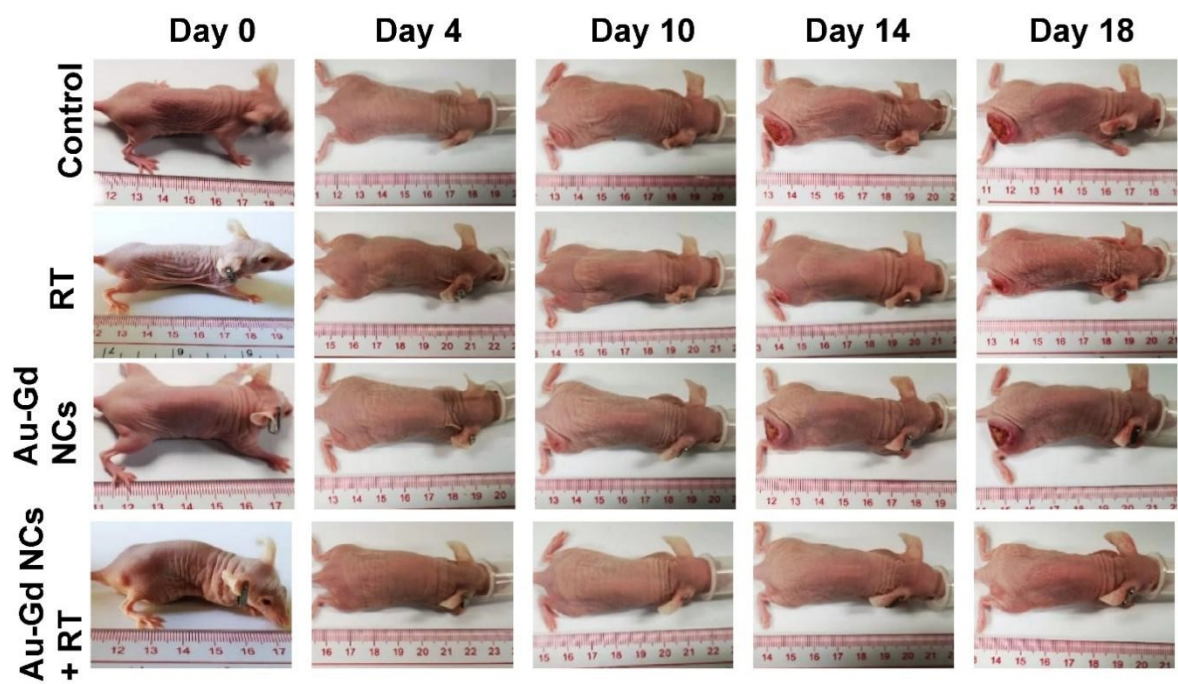

Figure S4. Photographs of mice with different treated groups.

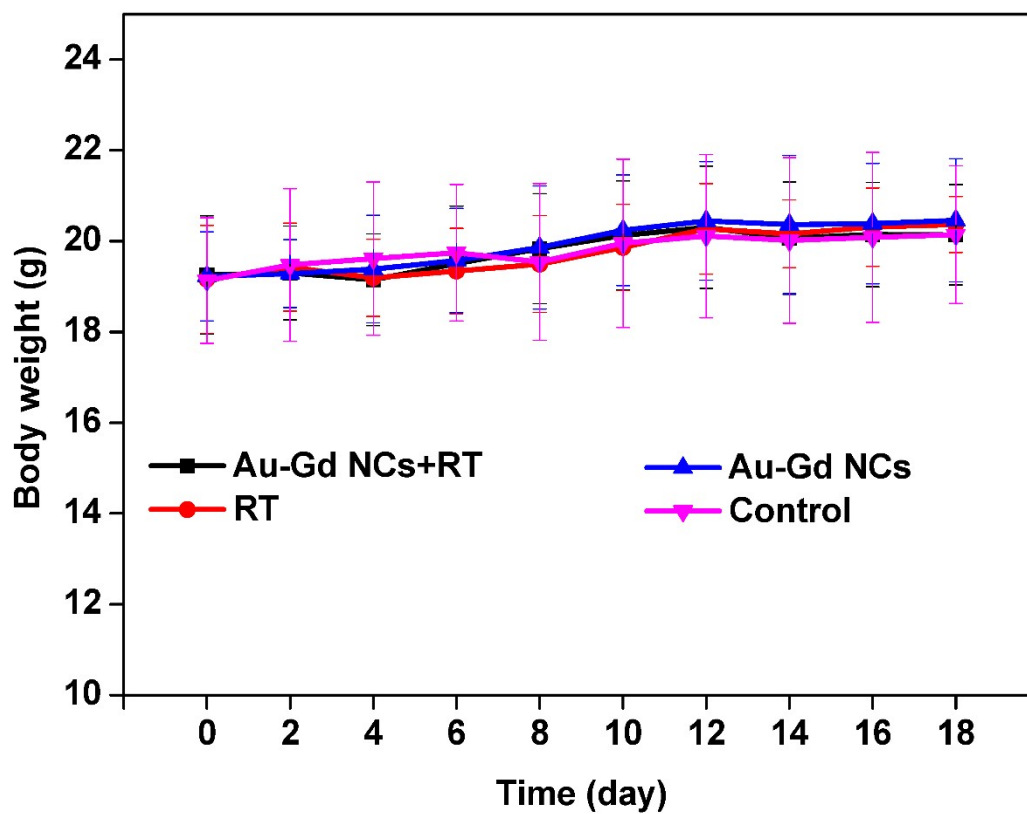

Figure S5. Body weights of tumor-bearing nude mice with different treatments during the 18 day evaluation period.
